# Supplementary material for: The Active Role of Leguminous Plant Components in Type 2 Diabetes
Source: Hindawi journal article supplement (doi:10.1155/2014/293961), 2014-01-01
Supplement: f1 [file 293961.f1.pdf]

**Supplementary table 1. The antidiabetic effect of the active compounds from legumes in *In vivo* human studies**

| Autors                     | Type of study                                                     | Bioactive compounds                              | Glycaemia             | Insulin | Body weight | Food Intake | Other activity                    |
|----------------------------|-------------------------------------------------------------------|--------------------------------------------------|-----------------------|---------|-------------|-------------|-----------------------------------|
| Udani et al., 2004 [10]    | <i>In vivo</i> Human double blank test                            | 1500 mg water extract of a common white bean/day | -                     | -       | ↓BMI        | -           | ↓ Triglycerides level             |
| Udani and Singh, 2007 [11] | <i>In vivo</i> Human double blank test                            | 1000mg fractionated white bean extract/day       | -                     | -       | ↓ BMI       | -           | -                                 |
| Celleno et al., 2007 [12]  | <i>In vivo</i> Human randomized, double-blind, placebo-controlled | 445 mg Phase 2 + 0.5 mg of chromium picolinate   | -                     | -       | ↓BMI        | -           | ↓body weight<br>↓fat mass<br>↓WHR |
| Maruyama et al., 2008 [13] | <i>In vivo</i> Human double blank test                            | Azuki juice 150g*5/day                           | -                     | -       | ↓ BMI       | -           | ↓ Triglycerides level             |
| Vinson et al., 2009 [19]   | <i>In vivo</i> Human cross-over,                                  | Phase 2 750mg, 1500mg                            | ↓ blood glucose level | -       | -           | -           | -                                 |

|                               |                                                                   |                                                              |                                                              |                                                         |           |              |                                                                                                                       |
|-------------------------------|-------------------------------------------------------------------|--------------------------------------------------------------|--------------------------------------------------------------|---------------------------------------------------------|-----------|--------------|-----------------------------------------------------------------------------------------------------------------------|
|                               | placebo-controlled                                                |                                                              |                                                              |                                                         |           |              |                                                                                                                       |
| Udani et al., 2009 [20]       | <i>In vivo</i><br>Human crosses, randomized study                 | Phase 2<br>1500, 2000, 3000mg                                | ↓ blood glucose level                                        | -                                                       | -         | -            | -                                                                                                                     |
| Wu et al., 2010 [21]          | <i>In vivo</i><br>Human double blinded placebo-controlled study   | Phase 2<br>2000 mg                                           | -                                                            | -                                                       | ↓BMI      | -            | No changes WHR                                                                                                        |
| Gobert et al., 2010 [22]      | <i>In vivo</i><br>Human placebo-controlled group                  | 88 mg isoflavones (genistein, daidzein, glycitein)/day equol | No change fasting and postprandial glucose or insulin levels | No change indexes of insulin sensitivity and resistance | -         | -            | No change HbA1c levels                                                                                                |
| Bertoglio et al., 2011 [23]   | <i>In vivo</i><br>Human placebo controlled trial                  | γ-conglutin<br>157.5mg, 315mg, 630mg                         | ↓Glucose level in blood                                      | -                                                       | -         | -            | -                                                                                                                     |
| Dove et al., 2011 [24]        | <i>In vivo</i><br>Human Control group                             | 22 g lupin protein                                           | ↓ Postprandial glycaemia                                     | -                                                       | -         | -            | -                                                                                                                     |
| Spadafranca et al., 2013 [25] | <i>In vivo</i><br>Human double-blind, randomized, crossover study | alpha-amylase inhibitor<br>6%*100mg                          | ↓blood glucose level                                         | ↑Insulin level                                          | -         | ↓food intake | ↓C-peptide concentration in blood plasma<br>↓ghrelin after a meal                                                     |
| Squadrito et al., 2013 [28]   | <i>In vivo</i><br>Human placebo controlled trial                  | Genistein<br>54 mg / day                                     | ↓Glucose levels                                              | ↓Insulin levels                                         | No change | -            | ↓Total cholesterol and triglyceride<br>↑HDL levels<br>↓Systolic and diastolic BP<br>↓visfatin and homocysteine levels |
